# Supplementary material
Source: publisher figshare collection journal article supplement (https://sage.figshare.com/ndownloader/files/10968557)
Supplement: Supplementary file 1 [file 10968557]

**Appendix 1. The 2016 FICM Survey**

| QUESTION                                                                                                                                    | ANSWER TEMPLATE                                                                                                                                                                                          |
|---------------------------------------------------------------------------------------------------------------------------------------------|----------------------------------------------------------------------------------------------------------------------------------------------------------------------------------------------------------|
|                                                                                                                                             |                                                                                                                                                                                                          |
| <b>Your Information</b>                                                                                                                     |                                                                                                                                                                                                          |
| <i>Please indicate below the details for the person completing this form.</i>                                                               |                                                                                                                                                                                                          |
| First Name:                                                                                                                                 | Free Text                                                                                                                                                                                                |
| Last Name:                                                                                                                                  | Date format                                                                                                                                                                                              |
| Date of Birth:                                                                                                                              | DDMMYYYY                                                                                                                                                                                                 |
| GMC Number:                                                                                                                                 | Numerical                                                                                                                                                                                                |
| Email:                                                                                                                                      | Free Text                                                                                                                                                                                                |
| What specialties are you currently registered in with the GMC?                                                                              | Multiple options: 1) ICM 2) Anaesthesia 3) Acute Medicine 4) Respiratory Medicine 5) Emergency Medicine 6) Renal Medicine 7) Cardiology 8) Infectious Diseases 9) Other, please specify (with FREE TEXT) |
| In which country did you obtain your specialist registration?                                                                               | Free Text                                                                                                                                                                                                |
| What specialties are you currently actively working in?                                                                                     | Multiple options: 1) ICM 2) Anaesthesia 3) Acute Medicine 4) Respiratory Medicine 5) Emergency Medicine 6) Renal Medicine 7) Cardiology 8) Infectious Diseases 9) Other, please specify (with FREE TEXT) |
|                                                                                                                                             |                                                                                                                                                                                                          |
| <b>Regional Information</b>                                                                                                                 |                                                                                                                                                                                                          |
| Country:                                                                                                                                    | Pre-populated dropdown                                                                                                                                                                                   |
| Local Education and Training Board                                                                                                          | Pre-populated dropdown                                                                                                                                                                                   |
| Trust / Board                                                                                                                               | Pre populated dropdown                                                                                                                                                                                   |
| Please provide us with the full name of your main hospital base (Please give full hospital name as this will aid subsequent data analysis): | Free text                                                                                                                                                                                                |
| Please select your Regional Advisor in ICM from the drop down menu:                                                                         | Pre-populated dropdown                                                                                                                                                                                   |
|                                                                                                                                             |                                                                                                                                                                                                          |
| <i>Please complete either the weekly or annual job plan section according to how your job plan is agreed</i>                                |                                                                                                                                                                                                          |
| <b>Job Plan Information</b>                                                                                                                 |                                                                                                                                                                                                          |
| Is your job plan arranged on a weekly or annual basis?                                                                                      | Weekly/Annual                                                                                                                                                                                            |
| <i>If weekly, link to weekly questions</i>                                                                                                  |                                                                                                                                                                                                          |
| <i>If annual, link to annual questions</i>                                                                                                  |                                                                                                                                                                                                          |
| <b>WEEKLY</b>                                                                                                                               |                                                                                                                                                                                                          |
| Total number of PAs in job plan?                                                                                                            | Numerical incl decimal                                                                                                                                                                                   |
| Total number of <b>clinical</b> Programmed Activities (PAs) contracted for ICM?                                                             | Numerical incl decimal                                                                                                                                                                                   |
| Total number of <b>clinical</b> PAs contracted for other specialties?                                                                       | Numerical incl decimal                                                                                                                                                                                   |
| Total number of <b>supporting</b> Programmed Activities (SPAs) contracted for all specialties?                                              | Numerical incl decimal                                                                                                                                                                                   |

|                                                                                                                                     |                                                                                                                                                                                                                                                                                                                                                                                   |
|-------------------------------------------------------------------------------------------------------------------------------------|-----------------------------------------------------------------------------------------------------------------------------------------------------------------------------------------------------------------------------------------------------------------------------------------------------------------------------------------------------------------------------------|
| Total number of PAs contracted for external / additional duties to your ICM job plan e.g. medical director or clinical lead for ICM | Numerical incl decimal                                                                                                                                                                                                                                                                                                                                                            |
| Total number of PAs contracted for critical care supportive duties (clinical work such as retrieval, hyperbaric medicine etc.)      | Numerical incl decimal                                                                                                                                                                                                                                                                                                                                                            |
| On average, how many hours of non-job planned time do you spend on the ICU for out of hours and weekends?                           | Numerical incl decimal                                                                                                                                                                                                                                                                                                                                                            |
| How frequent is your re-attendance on the unit overnight?                                                                           | Less than 1:5 nights, every 1:5 to 1:10 nights, more than 1:10 nights                                                                                                                                                                                                                                                                                                             |
| Why do you need to re-attend?                                                                                                       | Free text                                                                                                                                                                                                                                                                                                                                                                         |
| Comments regarding job plan                                                                                                         | Free text                                                                                                                                                                                                                                                                                                                                                                         |
|                                                                                                                                     |                                                                                                                                                                                                                                                                                                                                                                                   |
| <b>ANNUALLY</b>                                                                                                                     |                                                                                                                                                                                                                                                                                                                                                                                   |
| Total number of PAs in job plan?                                                                                                    | Numerical incl decimal                                                                                                                                                                                                                                                                                                                                                            |
| Total number of <b>clinical</b> Programmed Activities (PAs) contracted for ICM?                                                     | Numerical incl decimal                                                                                                                                                                                                                                                                                                                                                            |
| Total number of <b>clinical</b> PAs contracted for other specialties?                                                               | Numerical incl decimal                                                                                                                                                                                                                                                                                                                                                            |
| Total number of <b>supporting</b> Programmed Activities (SPAs) contracted for all specialties?                                      | Numerical incl decimal                                                                                                                                                                                                                                                                                                                                                            |
| Total number of PAs contracted for external / additional duties to your ICM job plan e.g. medical director or clinical lead for ICM | Numerical incl decimal                                                                                                                                                                                                                                                                                                                                                            |
| Total number of PAs contracted for critical care supportive duties (clinical work such as retrieval, hyperbaric medicine etc.)      | Numerical incl decimal                                                                                                                                                                                                                                                                                                                                                            |
| On average, how many hours of non-job planned time do you spend on the ICU for out of hours and weekends?                           | Numerical incl decimal                                                                                                                                                                                                                                                                                                                                                            |
| How frequent is your re-attendance on the unit overnight?                                                                           | Less than 1:5 nights, every 1:5 to 1:10 nights, more than 1:10 nights                                                                                                                                                                                                                                                                                                             |
| Why do you need to re-attend?                                                                                                       | Free text                                                                                                                                                                                                                                                                                                                                                                         |
| Comments regarding job plan                                                                                                         | Free text                                                                                                                                                                                                                                                                                                                                                                         |
|                                                                                                                                     |                                                                                                                                                                                                                                                                                                                                                                                   |
| <b>Career Plans</b>                                                                                                                 |                                                                                                                                                                                                                                                                                                                                                                                   |
| <i>We appreciate answers will reflect your current intentions.</i>                                                                  |                                                                                                                                                                                                                                                                                                                                                                                   |
| At what age do you anticipate permanently stopping clinical critical care medicine?                                                 | Numerical                                                                                                                                                                                                                                                                                                                                                                         |
| Do you intend to practice ICM for the remainder of your career?                                                                     | Yes/No                                                                                                                                                                                                                                                                                                                                                                            |
| <i>If No, link to pre-populated dropdown with multiple selection options</i>                                                        | Work-Life balance, Private practice, Lack of critical care capacity and finding beds, patients dying, dealing with families of patients, conflict with colleagues, conflict with nursing staff, lack of junior medical staff, junior staff lacking expected competencies, frequency of on-call, stress, work intensity, intend to stop/reduce ICM in favour of another speciality |
| Do you plan to alter your ICM commitment in the next 2 years?                                                                       | Exclusive selection:1) Increase 2) Decrease 3) Neither                                                                                                                                                                                                                                                                                                                            |
| Please provide further details if you are planning to increase or decrease your ICM commitment in the next 2 years.                 | Free text                                                                                                                                                                                                                                                                                                                                                                         |

|                                                                                       |                                                                                                                                                |
|---------------------------------------------------------------------------------------|------------------------------------------------------------------------------------------------------------------------------------------------|
| Do you find ICM significantly stressful enough to influence your future career plans? | Yes/No                                                                                                                                         |
| <i>If yes, link to next question</i>                                                  |                                                                                                                                                |
| Is there anything that could be changed that might reduce this effect?                | Free Text.                                                                                                                                     |
|                                                                                       |                                                                                                                                                |
|                                                                                       |                                                                                                                                                |
| The following questions are about your entire unit in your position as Clinical Lead  |                                                                                                                                                |
|                                                                                       |                                                                                                                                                |
| <b>Unit Information: Facilities at September 2015</b>                                 |                                                                                                                                                |
| Are you the clinical lead for your unit?                                              | Yes for one unit, Yes for more than one unit, No                                                                                               |
| <i>If yes for one unit, continue to question ???</i>                                  |                                                                                                                                                |
| <i>If yes for more than one unit, continue to questions???</i>                        | Possible to go to more than one set of the questions below?                                                                                    |
| <i>If no, go to the thank you message at the end of the census</i>                    |                                                                                                                                                |
|                                                                                       |                                                                                                                                                |
| What type of critical care subspecialty is this unit?                                 | General Adult Critical Care Unit, Cardiac Critical Care Unit, Neurocritical Care Unit, Burns Critical Care Unit, Paediatric Critical Care Unit |
| Does your unit work to a closed model of care?                                        | Yes/No                                                                                                                                         |
| Total number of staffed critical care beds on your unit? (include level 2 and 3)      | Numerical incl decimal                                                                                                                         |
| Number of CCMDs calendar bed days?                                                    | Numerical incl decimal                                                                                                                         |
|                                                                                       |                                                                                                                                                |
| <b>Unit Information: Non consultant staffing</b>                                      |                                                                                                                                                |
| <b>Trainees</b>                                                                       |                                                                                                                                                |
| Is there a dedicated trainee on the unit 24/7?                                        | Yes/No                                                                                                                                         |
| Does the dedicated trainee: patient ratio exceed 1:8 in the day?                      | Yes/No                                                                                                                                         |
| Does the dedicated trainee: patient ratio exceed 1:8 at night?                        | Yes/No                                                                                                                                         |
| Does the dedicated trainee: patient ratio exceed 1:8 during weekends?                 | Yes/No                                                                                                                                         |
| Does the dedicated trainee: patient ratio exceed 1:8 during bank holidays?            | Yes/No                                                                                                                                         |
| <b>Staff Grade doctors</b>                                                            |                                                                                                                                                |
| Is there a dedicated staff grade on the unit 24/7?                                    | Yes/No                                                                                                                                         |
| Does the dedicated staff grade: patient ratio exceed 1:8 in the day?                  | Yes/No                                                                                                                                         |
| Does the dedicated staff grade: patient ratio exceed 1:8 at night?                    | Yes/No                                                                                                                                         |
| Does the dedicated staff grade: patient ratio exceed 1:8 during weekends?             | Yes/No                                                                                                                                         |
| Does the dedicated staff grade: patient ratio exceed 1:8 during bank holidays?        | Yes/No                                                                                                                                         |
| <b>ACCPs or equivalent</b>                                                            |                                                                                                                                                |
| Is there a dedicated ACCP or equivalent on the unit 24/7?                             | Yes/No                                                                                                                                         |
| Does the dedicated ACCP or equivalent: patient ratio exceed 1:8 in the day?           | Yes/No                                                                                                                                         |

|                                                                                                                                                                                    |                                                                                                                                                                         |
|------------------------------------------------------------------------------------------------------------------------------------------------------------------------------------|-------------------------------------------------------------------------------------------------------------------------------------------------------------------------|
| Does the dedicated ACCP or equivalent: patient ratio exceed 1:8 at night?                                                                                                          | Yes/No                                                                                                                                                                  |
| Does the dedicated ACCP or equivalent: patient ratio exceed 1:8 during weekends?                                                                                                   | Yes/No                                                                                                                                                                  |
| Does the dedicated ACCP or equivalent: patient ratio exceed 1:8 during bank holidays?                                                                                              | Yes/No                                                                                                                                                                  |
|                                                                                                                                                                                    |                                                                                                                                                                         |
| <b>Unit Information: Consultant staffing</b>                                                                                                                                       |                                                                                                                                                                         |
| What is the total WTE for consultants on this unit? (WTE solely for critical care on this unit alone. Consider 1 WTE = 10PAs for clinical and non-clinical critical care medicine) | Numerical                                                                                                                                                               |
| How many individual consultants provide clinical work for this unit?                                                                                                               | Numerical                                                                                                                                                               |
| Is care led by a consultant in Intensive Care Medicine every day of the week?                                                                                                      | Yes/No                                                                                                                                                                  |
| When on call for critical care, are the critical care consultants covering another specialty?                                                                                      | Yes/No                                                                                                                                                                  |
| If so, what?                                                                                                                                                                       | <i>Multiple answers:</i> General Adult Critical Care Unit, Cardiac Critical Care Unit, Neurocritical Care Unit, Burns Critical Care Unit, Paediatric Critical Care Unit |
| Are consultants contractually required to be resident 24/7?                                                                                                                        | Yes/No                                                                                                                                                                  |
| Is an ICM consultant available 24/7 to lead twice daily ward rounds?                                                                                                               | Yes/No                                                                                                                                                                  |
| Is an ICM consultant available 24/7 to attend the unit in 30 minutes?                                                                                                              | Yes/No                                                                                                                                                                  |
| Are there any consultant posts with ICM clinical PAs currently unfilled?                                                                                                           | Yes/No                                                                                                                                                                  |
| If so, please specify how many?                                                                                                                                                    |                                                                                                                                                                         |
|                                                                                                                                                                                    |                                                                                                                                                                         |
| Please provide any other general comments you have regarding ICM or the census:                                                                                                    | Free Text                                                                                                                                                               |
